# Supplementary material
Source: PubMed Central journal article supplement (PMC3901817)
Supplement: hvi-9-1272-s01.pdf [file hvi-9-1272-s01.pdf]

## Supplemental Material to:

Samuel Aballéa, Aurélie Millier, Sibilia Quilici, Stuart Carroll,  
Stavros Petrou and Mondher Toumi

**A critical literature review of health economic evaluations  
in rotavirus vaccination**

2013; 9(6)

<http://dx.doi.org/10.4161/hv.24253>

[www.landesbioscience.com/journals/vaccines/article/24253](http://www.landesbioscience.com/journals/vaccines/article/24253)

## Supplementary Digital Content

---

|                                                                                                      |    |
|------------------------------------------------------------------------------------------------------|----|
| Table 1. Results of CEA or CUA.....                                                                  | 2  |
| Table 2. Vaccine efficacy data used in economic studies reviewed - Rotarix only .....                | 7  |
| Table 3. Vaccine efficacy data used in economic studies reviewed - RotaTeq only .....                | 9  |
| Table 4. Vaccine efficacy data used in economic studies reviewed - Rotarix & RotaTeq .....           | 10 |
| Table 5. RVGE incidence data used in economic studies reviewed .....                                 | 12 |
| Table 6. Average yearly incidence of RVGE-related hospitalization in economic studies reviewed ..... | 13 |
| Table 7. Average yearly incidence of physician visits in economic studies reviewed.....              | 15 |
| Table 8. Average yearly incidence of emergency department visits in economic studies reviewed.....   | 16 |
| Table 9. Annual death rate in economic studies reviewed .....                                        | 17 |
| Table 10. Inputs and sources used by studies using QALYs and DALYs.....                              | 18 |

Table 1. Results of CEA or CUA

| CONTINENT | REF      | AUTHOR        | YEAR | COUNTRY     | VACCINE    | PERSPECTIVE        | IC PER CASE AVOIDED                                                       | IC PER HOSP AVOIDED                                                                 | IC PER QALY GAINED                                                                   | IC PER LIFE-YEAR GAINED                                                   | IC PER LIFE SAVED                                                                    | IC PER DALY AVERTED                                                    |
|-----------|----------|---------------|------|-------------|------------|--------------------|---------------------------------------------------------------------------|-------------------------------------------------------------------------------------|--------------------------------------------------------------------------------------|---------------------------------------------------------------------------|--------------------------------------------------------------------------------------|------------------------------------------------------------------------|
| Europe    | [13]     | Fruytier      | 2006 | Belgium     | RX         | TPP & soc.         | -                                                                         | -                                                                                   | TPP €51,000<br>Soc. dominant                                                         | -                                                                         | -                                                                                    | -                                                                      |
|           | [15]     | Bilcke        | 2008 | Belgium     | RX & RQ    | TPP & soc.         | RX TPP €167<br>RX Soc. €16<br>RQ TPP €219<br>RQ Soc. €63                  | RX TPP €2,083<br>RX Soc. €196<br>RQ TPP €2,479<br>RQ Soc. €719                      | RX TPP €51,030<br>RX Soc. €7,572<br>RQ TPP €65,767<br>RQ Soc. €30,227                | RX TPP €700,102<br>RX Soc. €34,396<br>RQ TPP €912,490<br>RQ Soc. €146,430 | RX TPP €32,020,502<br>RX Soc. €1,572,838<br>RQ TPP €41,737,262<br>RQ Soc. €6,702,022 | -                                                                      |
|           | [16]     | Nohynek       | 2009 | Finland     | RX & RQ    | TPPa) & Soc.       | -                                                                         | -                                                                                   | RQ TPP €45,199<br>RX TPP €25,218                                                     | -                                                                         | -                                                                                    | -                                                                      |
|           | [19]     | Melliez       | 2007 | France      | RX & RQ    | Soc.               | -                                                                         | €6,547                                                                              | €138,693<br>RQ €151,000<br>RX €98,000                                                | €298,401                                                                  | -                                                                                    | -                                                                      |
|           | [20]     | Standaert     | 2008 | France      | RX         | Limited soc.       | € 212                                                                     | €2,656                                                                              | € 44,583                                                                             | -                                                                         | € 5,642,719                                                                          | -                                                                      |
|           | [22]     | Hammerschmidt | 2007 | Germany     | RX         | soc.               | -                                                                         | -                                                                                   | €3,770                                                                               | -                                                                         | -                                                                                    | -                                                                      |
|           | [23]     | Buesch        | 2007 | Germany     | RQ         | TPP                | 78 €                                                                      | €1,406                                                                              | NA                                                                                   | -                                                                         | -                                                                                    | -                                                                      |
|           | [25]     | Brüggenjürgen | 2009 | Germany     | RQ         | Soc.               | All cases €66<br>Cases seeking medical €148<br>GP case €178               | € 1 076                                                                             | -                                                                                    | -                                                                         | -                                                                                    | -                                                                      |
|           | [26]     | Syriopoulou   | 2011 | Greece      | RQ         | TPP                | No ICER is provided in the base-case analysis                             |                                                                                     |                                                                                      |                                                                           |                                                                                      |                                                                        |
|           | [27]     | Redmon        | 2009 | Ireland     | RX         | TPP                | -                                                                         | €228                                                                                | €13,064                                                                              | €1,049,129                                                                | -                                                                                    | -                                                                      |
|           | [28]     | Tilson        | 2011 | Ireland     | RX         | TPP                | €81                                                                       | €759                                                                                | €112,048                                                                             | €11,103,154                                                               | -                                                                                    | -                                                                      |
|           | [29]     | Panatto       | 2009 | Italy       | RX         | TPP & soc.         | -                                                                         | -                                                                                   | TPP 9,186€<br>Soc. dominant                                                          | -                                                                         | -                                                                                    | -                                                                      |
|           | [30]     | Giammancio    | 2009 | Italy       | RX or RQ   | TPP & soc.         | € 96.44                                                                   | -                                                                                   | -                                                                                    | -                                                                         | -                                                                                    | -                                                                      |
|           | [32]     | Goossens      | 2007 | Netherlands | RX         | soc.               | -                                                                         | -                                                                                   | €21,900                                                                              | -                                                                         | -                                                                                    | -                                                                      |
|           | [33]     | Zomer         | 2008 | Netherlands | RX & RQ    | TPP or soc.        | -                                                                         | -                                                                                   | -                                                                                    | Soc. €204,000<br>TPP €211,000                                             | -                                                                                    | Soc. €119,000<br>TPP €124,000                                          |
|           | [34]     | Mangen        | 2010 | Netherlands | RX & RQ    | TPP & soc.         | RX TPP €260<br>RX soc. €240<br>RQ TPP €300<br>RQ soc. €280                | RX TPP €3,800<br>RX soc. €3,600<br>RQ TPP €4,100<br>RQ soc. € 3,800                 | -                                                                                    | RX TPP €95,000<br>RX soc. €88,000<br>RQ TPP €100,000<br>RQ soc. €94,000   | RX TPP €3,800,000<br>RX soc. €3,500,000<br>RQ TPP €4,000,000<br>RQ soc. €3,700,000   | RX TPP €53,000<br>RX soc. €49,000<br>RQ TPP €58,000<br>RQ soc. €54,000 |
|           | [35]     | Rozenbaum     | 2011 | Netherlands | RQ         | Soc.               | -                                                                         | -                                                                                   | Vacc. cost of<br>- €50 €7,965<br>- €75 €46,717<br>- €100 €85,468                     | -                                                                         | -                                                                                    | -                                                                      |
|           | [36]     | André         | 2008 | Portugal    | RX         | TPP                | -                                                                         | -                                                                                   | \$25,854                                                                             | -                                                                         | -                                                                                    | -                                                                      |
|           | [38]     | Rubio-Perez   | 2011 | Spain       | RQ & RX    | TPP & soc.         | RQ soc.: €237.28<br>RQ TPP: €389.84<br>RX soc: €121.88<br>RX TPP: €273.57 | RQ soc.: €7,136.53<br>RQ TPP: €11,724.91<br>RX soc: €5,099.67<br>RX TPP: €11,446.52 | RQ soc. €45,624.83<br>RQ TPP: €74,958.99<br>RX soc. €23,435.93<br>RX TPP: €52,603.33 | -                                                                         | -                                                                                    | -                                                                      |
|           | [39]     | Largerion     | 2006 | UK          | RQ         | TPP & soc.         | -                                                                         | Soc. £0 - 1,050<br>TPP £2,462 - £3,515                                              | -                                                                                    | -                                                                         | -                                                                                    | -                                                                      |
| [40]      | Jit      | 2007          | UK   | RX & RQ     | TPP        | RQ £525<br>RX £391 | RQ £3,803<br>RX £3,647                                                    | RQ £79,900<br>RX £61,000                                                            | -                                                                                    | RQ £15,634,105<br>RX £14,992,022                                          | -                                                                                    |                                                                        |
| [41]      | Lorgelly | 2008          | UK   | RX or RQ    | TPP & Soc. | TPP £60.41         | TPP £2,526.54                                                             | -                                                                                   | -                                                                                    | TPP £177,212.00                                                           | -                                                                                    |                                                                        |

| CONTINENT     | REF           | AUTHOR           | YEAR               | COUNTRY       | VACCINE | PERSPECTIVE           | IC PER CASE AVOIDED       | IC PER HOSP AVOIDED | IC PER QALY GAINED          | IC PER LIFE-YEAR GAINED                                   | IC PER LIFE SAVED                                                                                 | IC PER DALY AVERTED                                      |          |
|---------------|---------------|------------------|--------------------|---------------|---------|-----------------------|---------------------------|---------------------|-----------------------------|-----------------------------------------------------------|---------------------------------------------------------------------------------------------------|----------------------------------------------------------|----------|
|               | [42]          | Martin           | 2009               | UK            | RX      | TPP & soc.            | -                         | -                   | TPP £23,298<br>Soc. £11,459 | -                                                         | -                                                                                                 | -                                                        |          |
|               | [44]          | Jit              | 2009               | Belgium       | RX & RQ | TPP (soc. in SA)      | -                         | -                   | about €65,000               | -                                                         | -                                                                                                 | -                                                        |          |
|               |               |                  |                    | UK            |         |                       |                           |                     | about €105,000              |                                                           |                                                                                                   |                                                          |          |
|               |               |                  |                    | Finland       |         |                       |                           |                     | about €15,000               |                                                           |                                                                                                   |                                                          |          |
| France        |               |                  |                    | about €70,000 |         |                       |                           |                     |                             |                                                           |                                                                                                   |                                                          |          |
| Netherlands   | about €45,000 |                  |                    |               |         |                       |                           |                     |                             |                                                           |                                                                                                   |                                                          |          |
| [80]          | Atherly       | 2009             | Europe             | RX            | TPP     | -                     | -                         | -                   | -                           | -                                                         | \$7 per dose \$201<br>\$1.25 per dose 42<br>cumulative 1\$05                                      |                                                          |          |
| Latin America | [45]          | Soárez           | 2008               | Brazil        | RX      | TPP & Soc.            | Soc. R\$ 37<br>TPP R\$ 57 | -                   | -                           | Soc. R\$ 1,329<br>TPP R\$ 2,014                           | Soc. R\$ 91,670<br>TPP R\$ 138,947                                                                | -                                                        |          |
|               | [46]          | Constenla        | 2008               | Brazil        | RX      | TPP                   | -                         | \$428               | -                           | NA                                                        | \$21,643                                                                                          | \$643                                                    |          |
|               | [47]          | Valentim         | 2009               | Brazil        | RX      | TPP & Soc.            | Soc. €8<br>TPP €14        | -                   | -                           | Soc. €292<br>TPP €504                                     | Soc. €20,154<br>TPP €35,350                                                                       | -                                                        |          |
|               | [48]          | Constenla        | 2006               | Chile         | RX      | TPP                   | -                         | \$722               | -                           | -                                                         | \$446,154                                                                                         | \$11,261                                                 |          |
|               | [49]          | De la Hoz        | 2010               | Colombia      | RX & RQ | Soc.                  | -                         | NA                  | -                           | -                                                         | Rx \$18,414<br>Rq \$38,649<br>Rq/Rx \$217,306                                                     | Rx \$8,943<br>Rq \$9,836<br>Rq/Rx \$7,787                |          |
|               | [50]          | Valencia-Mendoza | 2008               | Mexico        | RQ      | TPP                   | \$968.23                  | \$14,814.88         | -                           | \$1,719.93 (not discounted)<br>\$4,283.75 (discounted LY) | \$122,058.40                                                                                      | -                                                        |          |
|               | [51]          | Constenla        | 2009               | Mexico        | RX      | TPP                   | -                         | \$ 1,839            | -                           | -                                                         | US\$ 39,102                                                                                       | US\$ 1,139                                               |          |
|               | [52]          | Constenla        | 2008               | Panama        | RX      | Soc.                  | -                         | \$355               | -                           | -                                                         | \$16,643                                                                                          | \$487                                                    |          |
|               | [53]          | Clark            | 2009               | Peru          | RX      | Government            | -                         | -                   | -                           | -                                                         | -                                                                                                 | Schedule 1 \$621<br>Schedule 2 \$615<br>Schedule 3 \$581 |          |
|               | [54]          | Constenla        | 2006               | Venezuela     | RX      | Soc. assumed, but TPP | -                         | \$1,203             | -                           | -                                                         | TPP \$46,698                                                                                      | TPP \$1,371                                              |          |
|               | [55]          | Rheingans        | 2007               | Argentina     | RX      | TPP                   | -                         | -                   | -                           | -                                                         | -                                                                                                 | \$193,609                                                | \$5,419  |
|               |               |                  |                    | Brazil        |         |                       |                           |                     |                             |                                                           |                                                                                                   | \$40,212                                                 | \$1,196  |
|               |               |                  |                    | Chile         |         |                       |                           |                     |                             |                                                           |                                                                                                   | \$422,497                                                | \$10,656 |
| Dom. Rep.     |               |                  |                    | \$14,956      |         |                       |                           |                     |                             |                                                           |                                                                                                   | \$447                                                    |          |
| Honduras      |               |                  |                    | \$8,972       |         |                       |                           |                     |                             |                                                           |                                                                                                   | \$269                                                    |          |
| Mexico        |               |                  |                    | \$71,052      |         |                       |                           |                     |                             |                                                           |                                                                                                   | \$2,070                                                  |          |
| Panama        |               |                  |                    | \$44,798      |         |                       |                           |                     |                             |                                                           |                                                                                                   | \$1,311                                                  |          |
| Venezuela     | \$41,408      | \$1,216          |                    |               |         |                       |                           |                     |                             |                                                           |                                                                                                   |                                                          |          |
| [79]          | Rheingans     | 2009             | America            | RX            | TPP     | -                     | -                         | -                   | -                           | -                                                         | Low income \$122<br>Lower-middle income \$321<br>Upper-middle income \$274<br>All countries \$109 |                                                          |          |
| [80]          | Atherly       | 2009             | Region of Americas | RX            | TPP     | -                     | -                         | -                   | -                           | -                                                         | \$7 per dose 289\$<br>\$1.25 per dose 26\$<br>cumulative 118\$                                    |                                                          |          |
| Asia/Pac      | [56]          | Newall           | 2007               | Australia     | RX & RQ | TPP & Soc.            | -                         | RX TPP \$2,775      | RX TPP                      | -                                                         | RX TPP\$63.3 million                                                                              | -                                                        |          |

| CONTINENT | REF  | AUTHOR   | YEAR | COUNTRY    | VACCINE              | PERSPECTIVE     | IC PER CASE AVOIDED                                     | IC PER HOSP AVOIDED | IC PER QALY GAINED                                                                                                                                                                                     | IC PER LIFE-YEAR GAINED | IC PER LIFE SAVED                                                                             | IC PER DALY AVERTED                                                                                                                                                                                                                                                                                                                                                  |
|-----------|------|----------|------|------------|----------------------|-----------------|---------------------------------------------------------|---------------------|--------------------------------------------------------------------------------------------------------------------------------------------------------------------------------------------------------|-------------------------|-----------------------------------------------------------------------------------------------|----------------------------------------------------------------------------------------------------------------------------------------------------------------------------------------------------------------------------------------------------------------------------------------------------------------------------------------------------------------------|
| ific      |      |          |      |            |                      |                 |                                                         | RQ TPP \$3,105      | child only \$122,528<br>1 caregiver \$60,073<br>2 caregivers \$39,791<br>RQ TPP<br>child only \$138,045<br>1 caregiver \$67,681<br>2 caregivers \$44,831<br>RX and RQ Soc.<br>Dominate no intervention |                         | RQ TPP \$71 million                                                                           |                                                                                                                                                                                                                                                                                                                                                                      |
|           | [57] | Wang     | 2009 | China      | not vaccine specific | Patient & Soc.  | Net savings per case avoided<br>Soc.\$1<br>Patient \$20 | -                   | -                                                                                                                                                                                                      | -                       | -                                                                                             | -                                                                                                                                                                                                                                                                                                                                                                    |
|           | [58] | Ho       | 2008 | Hong Kong  | RQ                   | Government      | -                                                       | -                   | -                                                                                                                                                                                                      | -                       | -                                                                                             | single cohort, with waning dominant for vacc. cost up to \$60 per course, US\$47580 at \$90 per course                                                                                                                                                                                                                                                               |
|           | [59] | Rose     | 2009 | India      | RX                   | TPP             | -                                                       | -                   | -                                                                                                                                                                                                      | 8,023 rupees            | -                                                                                             | -                                                                                                                                                                                                                                                                                                                                                                    |
|           | [60] | Esposito | 2010 | India      | RX                   | TPP             | -                                                       | -                   | -                                                                                                                                                                                                      | -                       | \$0.15 per dose CS<br>\$0.28 per dose \$0<br>\$1 per dose \$662.94<br>\$7 per dose \$6,199.88 | \$0.15 per dose CS<br>\$0.28 per dose \$0<br>\$1 per dose \$21.41<br>\$7 per dose \$200.21                                                                                                                                                                                                                                                                           |
|           | [61] | Chodick  | 2009 | Israel     | RX & RQ              | TPP & Soc.      | -                                                       | -                   | RQ TPP \$50,848<br>RQ Soc. \$30,674<br>RX TPP \$31,396<br>RX Soc. \$10,995                                                                                                                             | -                       | -                                                                                             | -                                                                                                                                                                                                                                                                                                                                                                    |
|           | [62] | Igarashi | 2009 | Japan      | RX                   | Soc.            | -                                                       | -                   | JPY 120,178                                                                                                                                                                                            | -                       | -                                                                                             | -                                                                                                                                                                                                                                                                                                                                                                    |
|           | [63] | Kang     | 2010 | Korea      | RQ                   | TPP & Soc.      | NO ICER is given in the base-case analysis              |                     |                                                                                                                                                                                                        |                         |                                                                                               |                                                                                                                                                                                                                                                                                                                                                                      |
|           | [64] | Flem     | 2009 | Kyrgyzstan | RX                   | National & Soc. | -                                                       | -                   | -                                                                                                                                                                                                      | -                       | -                                                                                             | Soc.<br>\$0.30/course CS<br>\$0.60/course CS<br>\$1.00/course CS<br>\$2.00/course CS<br>\$3.00/course 22<br>\$5.00/course \$78<br>\$7.00/course \$134<br>\$10.00/course \$218<br>Gvnmnt<br>\$0.30/course CS<br>\$0.60/course CS<br>\$1.00course CS<br>\$2.00/course \$20<br>\$3.00/course \$48<br>\$5.00/course \$104<br>\$7.00/course \$160<br>\$10.00/course \$243 |

| CONTINENT | REF  | AUTHOR               | YEAR | COUNTRY                      | VACCINE | PERSPECTIVE           | IC PER CASE AVOIDED                                            | IC PER HOSP AVOIDED                                              | IC PER QALY GAINED                                                  | IC PER LIFE-YEAR GAINED                                                | IC PER LIFE SAVED                                                                                                                                                                                                                                                                                         | IC PER DALY AVERTED                                                                                                                                                                                                                                                                    |
|-----------|------|----------------------|------|------------------------------|---------|-----------------------|----------------------------------------------------------------|------------------------------------------------------------------|---------------------------------------------------------------------|------------------------------------------------------------------------|-----------------------------------------------------------------------------------------------------------------------------------------------------------------------------------------------------------------------------------------------------------------------------------------------------------|----------------------------------------------------------------------------------------------------------------------------------------------------------------------------------------------------------------------------------------------------------------------------------------|
|           | [65] | Milne                | 2009 | New-Zealand                  | RQ      | TPP, Soc., Government | (in year 5)<br>Society \$305<br>TPP \$444<br>Government \$488  | (in year 5)<br>Soc. \$2,509<br>TPP \$3,648<br>Government \$4,015 | (in year 5)<br>Soc. \$46,092<br>TPP \$67,007<br>Government \$73,751 | (in year 5)<br>Soc. \$143,097<br>TPP \$208,027<br>Government \$228,964 | (in year 5)<br>Soc. \$3,756,803<br>TPP \$5,461,436<br>Government \$6,011,114                                                                                                                                                                                                                              | -                                                                                                                                                                                                                                                                                      |
|           | [66] | Wu                   | 2009 | Taiwan                       | RX & RQ | TPP & Soc.            | RX TPP \$135<br>RX Soc. \$103<br>RQ TPP \$150<br>RQ Soc. \$117 | -                                                                | -                                                                   | RX \$453.24<br>RQ \$453.24                                             | -                                                                                                                                                                                                                                                                                                         | -                                                                                                                                                                                                                                                                                      |
|           | [67] | Chotivitay atarakorn | 2010 | Thailand                     | RX      | Government            | -                                                              | -                                                                | -                                                                   | -                                                                      | \$11,800                                                                                                                                                                                                                                                                                                  | \$370                                                                                                                                                                                                                                                                                  |
|           | [68] | Isakbaeva            | 2006 | Uzbekistan                   | RX      | TPP & Soc.            | -                                                              | -                                                                | -                                                                   | -                                                                      | price \$2 \$3,103<br>price \$5 \$8,031<br>price \$10 \$16,245<br>price \$20 \$32,673                                                                                                                                                                                                                      | price \$2 \$94<br>price \$5 \$242<br>price \$10 \$489<br>price \$20 \$984                                                                                                                                                                                                              |
|           | [69] | Fischer              | 2005 | Vietnam                      | RX      | TPP & Soc.            | -                                                              | -                                                                | -                                                                   | -                                                                      | \$5/course \$1,330<br>\$10/course \$3,015<br>\$15/course \$4,701<br>\$20/course \$6,385                                                                                                                                                                                                                   | \$5/course \$40<br>\$10/course \$91<br>\$15/course \$141<br>\$20/course \$192                                                                                                                                                                                                          |
|           | [70] | Kim                  | 2009 | Vietnam                      | RX      | TPP & Soc.            | -                                                              | -                                                                | -                                                                   | -                                                                      | -                                                                                                                                                                                                                                                                                                         | TPP \$550<br>soc. \$540                                                                                                                                                                                                                                                                |
|           | [71] | Podewils             | 2005 | Asia                         | RX      | TPP                   | -                                                              | -                                                                | -                                                                   | -                                                                      | (low GNI / middle GNI / high GNI)<br>\$2 per course \$664 / \$523 / cost saving<br><br>\$10 per course \$3,574 / \$6,875 / cost saving<br><br>\$20 per course \$7,212 / \$14,815 / \$59,734<br><br>\$40 per course \$14,488 / \$30,695 / \$308,616<br><br>\$60 per course \$21,764 / \$46,575 / \$557,498 | (low GNI / middle GNI / high GNI)<br>\$2 per course \$19.47 / \$15.32 / cost saving<br><br>\$10 per course \$105 / \$201 / cost saving<br><br>\$20 per course \$212 / \$434 / \$1,653<br><br>\$40 per course \$425 / \$899 / \$8,541<br><br>\$60 per course \$638 / \$1,364 / \$15,428 |
|           | [80] | Atherly              | 2009 | Southeast Asian region       | RX      | TPP                   | -                                                              | -                                                                | -                                                                   | -                                                                      | -                                                                                                                                                                                                                                                                                                         | \$7 per dose \$47<br>\$1.25 per dose \$28<br>cumulative \$54                                                                                                                                                                                                                           |
|           |      |                      |      | Western Pacific region       |         |                       | -                                                              | -                                                                | -                                                                   | -                                                                      | -                                                                                                                                                                                                                                                                                                         | \$7 per dose \$210<br>\$1.25 per dose \$29<br>cumulative \$81                                                                                                                                                                                                                          |
|           |      |                      |      | Eastern Mediterranean region |         |                       | -                                                              | -                                                                | -                                                                   | -                                                                      | -                                                                                                                                                                                                                                                                                                         | \$7 per dose \$419<br>\$1.25 per dose \$66<br>cumulative \$33                                                                                                                                                                                                                          |

| CONTINENT | REF  | AUTHOR    | YEAR | COUNTRY                   | VACCINE   | PERSPECTIVE | IC PER CASE AVOIDED                                | IC PER HOSP AVOIDED | IC PER QALY GAINED                                                                                                                 | IC PER LIFE-YEAR GAINED          | IC PER LIFE SAVED                                          | IC PER DALY AVERTED                                                                                |
|-----------|------|-----------|------|---------------------------|-----------|-------------|----------------------------------------------------|---------------------|------------------------------------------------------------------------------------------------------------------------------------|----------------------------------|------------------------------------------------------------|----------------------------------------------------------------------------------------------------|
|           | [79] | Rheingans | 2009 | Southeast Asia            | RX        | TPP         | -                                                  | -                   | -                                                                                                                                  | -                                | -                                                          | Low income \$109<br>Lower-middle income \$348<br>All countries \$112                               |
|           |      |           |      | Western Pacific           |           |             | -                                                  | -                   | -                                                                                                                                  | -                                | -                                                          | Low income \$142<br>Lower-middle income \$280<br>Upper-middle income \$1336<br>All countries \$260 |
|           |      |           |      | Eastern Mediterranean     |           |             | -                                                  | -                   | -                                                                                                                                  | -                                | -                                                          | Low income \$104<br>Lower-middle income \$234<br>Upper-middle income \$340<br>All countries \$143  |
| USA       | [72] | Widdowson | 2007 | USA                       | RQ        | TPP & Soc.  | Soc. \$138<br>TPP \$336                            | -                   | -                                                                                                                                  | Soc. \$ 197,190<br>TPP \$470,729 | -                                                          | -                                                                                                  |
|           | [73] | Shim      | 2009 | USA                       | RX & RQ   | TPP & Soc.  | TPP \$77.30<br>Soc. dominant                       | -                   | TPP, RQ<br>1 child \$192,100<br>1 child + 1 caregiver \$104,610<br>TPP, RX<br>1 child \$148,270<br>1 child + 1 caregiver \$80,740) | -                                | TPP \$7,482,000<br>Soc. dominant                           | -                                                                                                  |
|           | [74] | Weycker   | 2009 | USA                       | RX vs. RQ | TPP & Soc.  | No ICER in the base-case analysis RX dominates RQ. |                     |                                                                                                                                    |                                  |                                                            |                                                                                                    |
| Africa    | [75] | Ortega    | 2009 | Egypt                     | RX        | MoH         | \$30.22 MOH                                        | -                   | -                                                                                                                                  | -                                | -                                                          | \$363 MOH                                                                                          |
|           | [76] | Tate      | 2009 | Kenya                     | RX        | Soc.        | -                                                  | -                   | -                                                                                                                                  | -                                | price \$2 0<br>price \$10 \$7500<br>price \$16 \$14000     | price \$2.07 0<br>price \$7.35 166<br>price \$9.26 227<br>price \$20.31 580                        |
|           | [77] | Berry     | 2010 | Malawi                    | RX        | TPP         | -                                                  | -                   | -                                                                                                                                  | -                                | GAVI alliance price USD 155.42<br>Market price USD 2288.73 | GAVI alliance price USD 5.07<br>Market price USD 74.73                                             |
|           | [78] | Tate      | 2011 | Uganda                    | RX        | TPP         | -                                                  | -                   | -                                                                                                                                  | -                                | 203412 Ushs (\$123)                                        | CS (-6567Ushs, -\$3.96)                                                                            |
|           | [79] | Rheingans | 2009 | Africa                    | RX        | TPP         | -                                                  | -                   | -                                                                                                                                  | -                                | -                                                          | Low income \$61<br>Lower-middle income \$561<br>Upper-middle income \$351<br>All \$67              |
|           | [80] | Atherly   | 2009 | African region            | RX        | TPP         | -                                                  | -                   | -                                                                                                                                  | -                                | -                                                          | \$7 per dose 78\$<br>\$1.25 per dose 14\$<br>cumulative 22\$                                       |
|           | [80] | Atherly   | 2009 | All GAVI Alliance regions | RX        | TPP         | -                                                  | -                   | -                                                                                                                                  | -                                | -                                                          | \$1 per dose \$118<br>\$1.25 per dose \$21<br>cumulative cost \$43                                 |

**Table 2. Vaccine efficacy data used in economic studies reviewed - Rotarix only**

| CONTINENT     | REF  | AUTHOR        | COUNTRY   | YEAR | VACCINE | VACCINE EFFICACY: ASSUMPTIONS                                                                                                                                                                                           |
|---------------|------|---------------|-----------|------|---------|-------------------------------------------------------------------------------------------------------------------------------------------------------------------------------------------------------------------------|
| Europe        | [20] | Standaert     | France    | 2008 | Rotarix | (1st year ; 2nd year)<br>rotavirus specific diarrhoea 87.1% ; 71.9%<br>GP visits 91.8% ; 76.2%<br>Hospitalization 100% ; 92.2%<br>Nosocomial 100% ; 92.2%                                                               |
|               | [22] | Hammerschmidt | Germany   | 2007 | Rotarix | Any grade of severity 87%<br>Severe cases 96%<br>Inpatient cases 100%                                                                                                                                                   |
|               | [27] | Redmon        | Ireland   | 2009 | Rotarix | (post dose 1 / post dose 2 YR 1/ post dose 2 YR 2)<br>any RVGE: 87.1% / 87.1% / 71.9%<br>severe RVGE: 89.8% / 91.8% / 76.2%<br>hospitalization: 89.8% / 100% / 92.2%<br>nosocomial: 89.8% / 100% / 92.2%                |
|               | [29] | Panatto       | Italy     | 2009 | Rotarix | not reported                                                                                                                                                                                                            |
|               | [42] | Martin        | UK        | 2009 | Rotarix | (1st year ; 2nd year)<br>RVGE: 87.1% ; 71.9%<br>GP visits: 91.8% ; 76.2%<br>Hospitalization: 100% ; 92.2%<br>Nosocomial infections: 100% ; 92.2%                                                                        |
| Latin America | [55] | Rheingans     | Argentina | 2007 | Rotarix | death: 85%<br>hospitalization: 85%<br>outpatient: 77.5%                                                                                                                                                                 |
|               | [45] | Soárez        | Brazil    | 2008 | Rotarix | 2 doses<br>Against mild diarrhoea 63%<br>Against moderate diarrhoea 63 %<br>Against severe diarrhoea 84.7 %<br>1 dose<br>Against mild diarrhoea 50%<br>Against moderate diarrhoea 50%<br>Against severe diarrhoea 81.1% |
|               | [46] | Constenla     | Brazil    | 2008 | Rotarix | outpatient visits: 85%<br>hospitalization: 85%<br>death: 85%                                                                                                                                                            |
|               | [47] | Valentim      | Brazil    | 2009 | Rotarix | not reported                                                                                                                                                                                                            |
|               | [48] | Constenla     | Chile     | 2006 | Rotarix | death: 85%<br>hospitalization: 85%<br>outpatient: 77.5%                                                                                                                                                                 |
|               | [51] | Constenla     | Mexico    | 2009 | Rotarix | outpatients visits 78%<br>hospitalization 85%<br>death 85%                                                                                                                                                              |
|               | [52] | Constenla     | Panama    | 2008 | Rotarix | death: 85%<br>hospitalization: 85%<br>ambulatory: 85%                                                                                                                                                                   |
|               | [53] | Clark         | Peru      | 2009 | Rotarix | One/Two dose(s):<br>75% / 85% against severe disease<br>57% / 70% against non severe disease                                                                                                                            |
|               | [54] | Constenla     | Venezuela | 2006 | Rotarix | death: 85%<br>hospitalization: 85%                                                                                                                                                                                      |



| CONTINENT    | REF  | AUTHOR              | COUNTRY                                                                                   | YEAR | VACCINE | VACCINE EFFICACY: ASSUMPTIONS                                                                                                                                                                                                                                                                                                                                                                                                                                                             |
|--------------|------|---------------------|-------------------------------------------------------------------------------------------|------|---------|-------------------------------------------------------------------------------------------------------------------------------------------------------------------------------------------------------------------------------------------------------------------------------------------------------------------------------------------------------------------------------------------------------------------------------------------------------------------------------------------|
| Asia/Pacific | [59] | Rose                | India                                                                                     | 2009 | Rotarix | ambulatory: 85%<br>Efficacy against severe infection:<br>- G and P proteins in common with Rotarix 0.908<br>- Either G or P in common with Rotarix 0.869<br>- Neither G nor P in common with Rotarix 0.714<br>(- overall: 0.804)<br>Ratio of efficacy against any symptomatic rotavirus infection to efficacy against severe infection 0.873<br>Ratio of efficacy against a symptomatic infection to efficacy against severe infection 0.437<br>Efficacy lower by 37.5% after 1 dose only |
|              | [60] | Esposito            | India                                                                                     | 2010 | Rotarix | 50% efficacy against death<br>50% efficacy against hospitalization<br>40% efficacy against clinic visit                                                                                                                                                                                                                                                                                                                                                                                   |
|              | [62] | Igarashi            | Japan                                                                                     | 2009 | Rotarix | not reported                                                                                                                                                                                                                                                                                                                                                                                                                                                                              |
|              | [64] | Flem                | Kyrgyzstan                                                                                | 2009 | Rotarix | hospitalization and deaths: 85%<br>outpatient visits: 63%                                                                                                                                                                                                                                                                                                                                                                                                                                 |
|              | [67] | Chotivitayatarakorn | Thailand                                                                                  | 2010 | Rotarix | 90% efficacy for prevention of rotavirus disease-associated deaths<br>85% efficacy for prevention of hospitalization<br>85% efficacy for preventing outpatient visits<br>65% efficacy for homecare                                                                                                                                                                                                                                                                                        |
|              | [68] | Isakbaeva           | Uzbekistan                                                                                | 2006 | Rotarix | 93% against deaths and hosp                                                                                                                                                                                                                                                                                                                                                                                                                                                               |
|              | [69] | Fischer             | Vietnam                                                                                   | 2005 | Rotarix | hospitalization and death 93%<br>outpatient 78%                                                                                                                                                                                                                                                                                                                                                                                                                                           |
|              | [70] | Kim                 | Vietnam                                                                                   | 2009 | Rotarix | Serotype-specific vaccine efficacy (against severe gastroenteritis)<br>G1P[8] 90.8% G3P[8], G4P[8], G9P[8] 86.9% G2P[4] and other combinations of G and P 45.4%<br>Vaccine efficacy against severe gastroenteritis (adjusted for the serotype distribution) 77%, reduced to 43% after 4 yrs<br>Vaccine efficacy against mild gastroenteritis, (not adjusted for the serotype distribution) 41%                                                                                            |
|              | [71] | Podewils            | Asia                                                                                      | 2005 | Rotarix | death: 93%<br>hospitalization: 93%<br>outpatient: 78% (1 year of life) 75% (after)<br>only 1 dose: 50% of full course                                                                                                                                                                                                                                                                                                                                                                     |
| Africa       | [75] | Ortega              | Egypt                                                                                     | 2009 | Rotarix | against overall disease: 64.5% (54.8-73.4)<br>against hospitalization 79.1 (70.8-86.5)                                                                                                                                                                                                                                                                                                                                                                                                    |
|              | [76] | Tate                | Kenya                                                                                     | 2011 | RotaTeq | Patients not seeking medical care: 71.3%<br>Paediatric consultations: 86%<br>Emergency visits: 93.7%<br>Hospitalizations: 95.8%<br>Nosocomial infections: 95.8%<br>Deaths: 95.8%                                                                                                                                                                                                                                                                                                          |
|              | [77] | Berry               | Malawi                                                                                    | 2010 | Rotarix | 49.5% efficacy against severe rotavirus                                                                                                                                                                                                                                                                                                                                                                                                                                                   |
|              | [78] | Tate                | Uganda                                                                                    | 2011 | Rotarix | Against death 50%<br>Against hospitalization 50%<br>Against outpatient visit 40%<br>One dose: 25%                                                                                                                                                                                                                                                                                                                                                                                         |
|              | [79] | Rheingans           | Africa<br>America<br>Eastern Mediterranean<br>Europe<br>Southeast Asia<br>Western Pacific | 2009 | Rotarix | Against severe RV disease resulting in hospitalization: 85%<br>Against mortality: 85%<br>Against outpatient visits for severe disease: 85%<br>Against outpatient visits for any severity: 70%<br><br>Receiving one dose: 50% of that of a full course                                                                                                                                                                                                                                     |
|              | [80] | Atherly             | Region of the Americas                                                                    | 2009 | Rotarix | severe rotavirus disease resulting in hospitalizations or mortality was 85%                                                                                                                                                                                                                                                                                                                                                                                                               |

| CONTINENT | REF | AUTHOR | COUNTRY                   | YEAR | VACCINE | VACCINE EFFICACY: ASSUMPTIONS                                                                                                                                                                                                                                                              |
|-----------|-----|--------|---------------------------|------|---------|--------------------------------------------------------------------------------------------------------------------------------------------------------------------------------------------------------------------------------------------------------------------------------------------|
|           |     |        | European Region           |      |         | Outpatient visits 78% on the basis of the mean efficacy against severe rotavirus gastroenteritis (85%) and any rotavirus gastroenteritis (70%)<br><br>One dose was assumed to be 50% as efficacious as a full course<br>Effectiveness reduction in subsequent seasons for mild cases: 0.04 |
|           |     |        | African region            |      |         |                                                                                                                                                                                                                                                                                            |
|           |     |        | Eastern                   |      |         |                                                                                                                                                                                                                                                                                            |
|           |     |        | Mediterranean region      |      |         |                                                                                                                                                                                                                                                                                            |
|           |     |        | Southeast Asian region    |      |         |                                                                                                                                                                                                                                                                                            |
|           |     |        | Western Pacific region    |      |         |                                                                                                                                                                                                                                                                                            |
|           |     |        | All GAVI Alliance regions |      |         |                                                                                                                                                                                                                                                                                            |

Table 3. Vaccine efficacy data used in economic studies reviewed - RotaTeq only

| CONTINENT | REF  | AUTHOR        | COUNTRY     | YEAR | VACCINE | VACCINE EFFICACY: ASSUMPTIONS                                                                                                                                                                                           |
|-----------|------|---------------|-------------|------|---------|-------------------------------------------------------------------------------------------------------------------------------------------------------------------------------------------------------------------------|
| Europe    | [14] | Dhont         | Belgium     | 2008 | RotaTeq | Hospitalizations reduction 95.8%<br>Nosocomial infections reduction 95.8%<br>GP/P visits reduction 86.0%<br>Deaths reduction 95.8%<br>Cases not seeking medical care reduction 86.0%<br>Waning rate after 2 years 10.0% |
|           | [17] | Trichard      | France      | 2007 | RotaTeq | not reported                                                                                                                                                                                                            |
|           | [18] | Huet          | France      | 2007 | RotaTeq | Hospitalizations 95.60%<br>Emergency visits 93.90%<br>GP/P visits 86.00%<br>Nosocomial infections 95.60%<br>Deaths 95.60%<br>Cases not seeking care 86.00%<br>Waning rate after 2 years 10.00%                          |
|           | [21] | Bénard        | France      | 2009 | RotaTeq | Patient not seeking medical care 74%<br>Physician office visits 86%<br>Emergency room visits 93.7 %<br>Hospitalizations 95.8 %<br>Nosocomial infections 95.8 %<br>Death 95.8 %                                          |
|           | [23] | Buesch        | Germany     | 2007 | RotaTeq | effectiveness characteristics up to 2 years post vaccination:<br>GP/P visits 86.0%<br>Hospitalization 95.6%<br>Waning: 10% after 2 years                                                                                |
|           | [24] | Greiner       | Germany     | 2008 | RotaTeq | not reported                                                                                                                                                                                                            |
|           | [25] | Brüggenjürgen | Germany     | 2009 | RotaTeq | Patient not seeking medical care 74%<br>GP office visits 86%<br>Hospitalizations 95.8 %<br>Nosocomial infections 95.8 %<br>Death 95.8%                                                                                  |
|           | [26] | Syriopoulou   | Greece      | 2011 | RotaTeq | Patients not seeking medical care: 71.3%<br>Paediatric consultations: 86%<br>Emergency visits: 93.7%<br>Hospitalizations: 95.8%<br>Nosocomial infections: 95.8%<br>Deaths: 95.8%                                        |
|           | [31] | Welte         | Netherlands | 2001 | RotaTeq | Mild gastroenteritis 55%<br>Inpatient treatment 80%                                                                                                                                                                     |

| CONTINENT     | REF  | AUTHOR           | COUNTRY   | YEAR | VACCINE | VACCINE EFFICACY: ASSUMPTIONS                                                                                                                                    |
|---------------|------|------------------|-----------|------|---------|------------------------------------------------------------------------------------------------------------------------------------------------------------------|
|               | [39] | Largeron         | UK        | 2006 | RotaTeq | Outpatient treatment 65%<br>not reported                                                                                                                         |
| Latin America | [50] | Valencia-Mendoza | Mexico    | 2008 | RotaTeq | Medical visits 1st year 87.7%<br>Medical visits 2nd year 73.8%<br>Hospital admissions 1st year 96.3%<br>Hospital admissions 2nd year 86.9%                       |
| Asia/Pacific  | [58] | Ho               | Hong Kong | 2008 | RotaTeq | Efficacy of RV vaccine 0–6 months 75% of vaccine efficacy<br>Preventing hospitalization 0.5–5 years 0.96<br>Preventing outpatient clinic visit 0.5–5 years 0.895 |
|               | [63] | Kang             | Korea     | 2010 | RotaTeq | Hospitalizations: 95.8%<br>Emergency visits: 93.7%<br>Office and clinic visits: 86%<br>Work loss days: 86.6%                                                     |
| USA           | [72] | Widdowson        | USA       | 2007 | RotaTeq | Mild/moderate gastroenteritis 65%<br>Death 90%<br>Hospitalization 90%<br>Emergency department visit 90%<br>Office visit 85%                                      |

Table 4. Vaccine efficacy data used in economic studies reviewed - Rotarix & RotaTeq

| CONTINENT | REF  | AUTHOR  | COUNTRY | YEAR | VACCINE             | VACCINE EFFICACY: ASSUMPTIONS                                                                                                                                                                                                                                                                                                                                                                                                        |
|-----------|------|---------|---------|------|---------------------|--------------------------------------------------------------------------------------------------------------------------------------------------------------------------------------------------------------------------------------------------------------------------------------------------------------------------------------------------------------------------------------------------------------------------------------|
| Europ     | [15] | Bilcke  | Belgium | 2008 | Rotarix vs. RotaTeq | Rotarix:<br>hosp. and nosocomial infections 100%<br>outpatient GP and pediatrician 92%<br>no medical care 87%<br>deaths 96%<br>RotaTeq:<br>hosp. and nosocomial infections 96%<br>outpatient GP and pediatrician 87%<br>no medical care 73%<br>deaths 98%                                                                                                                                                                            |
|           | [16] | Nohynek | Finland | 2009 | Rotarix vs. RotaTeq | severe RV diarrhoea requiring rehydration: >90%<br>any RVGE: 60-70%                                                                                                                                                                                                                                                                                                                                                                  |
|           | [19] | Melliez | France  | 2007 | Rotarix vs. RotaTeq | rotavirus diarrhoea regardless of severity: 0.70<br>severe forms: 0.85                                                                                                                                                                                                                                                                                                                                                               |
|           | [28] | Tilson  | Ireland | 2011 | Rotarix & RotaTeq   | Rotarix<br>Home treated cases 87.1%<br>Cases treated in primary care 89.9%<br>Hospitalizations 100%<br>A&E 100%<br>Rotarix Partial protection between the 1 <sup>st</sup> and 2 <sup>nd</sup> dose<br>Home treated cases 78.4%<br>Cases treated in primary care 80.9%<br>Hospitalizations 90%<br>A&E visits 90%<br>RotaTeq<br>Home treated cases 72.0%<br>Cases treated in primary care 92.5%<br>Hospitalizations 97.3%<br>A&E 95.4% |

| CONTINENT     | REF  | AUTHOR       | COUNTRY     | YEAR | VACCINE             | VACCINE EFFICACY: ASSUMPTIONS                                                                                                                                                                                                                                                                                                                                                                                                                                                                                                                                                                                                                                                                                                                                                                                                                                                                                                                                                                                                                                                              |
|---------------|------|--------------|-------------|------|---------------------|--------------------------------------------------------------------------------------------------------------------------------------------------------------------------------------------------------------------------------------------------------------------------------------------------------------------------------------------------------------------------------------------------------------------------------------------------------------------------------------------------------------------------------------------------------------------------------------------------------------------------------------------------------------------------------------------------------------------------------------------------------------------------------------------------------------------------------------------------------------------------------------------------------------------------------------------------------------------------------------------------------------------------------------------------------------------------------------------|
|               |      |              |             |      |                     | RotaTeq Partial protection between the 1 <sup>st</sup> and 2 <sup>nd</sup> dose<br>Home treated cases 60.7%<br>Cases treated in primary care 78.0%<br>Hospitalizations 82%<br>A&E visits 80.4%<br>RotaTeq Partial protection between the 2 <sup>nd</sup> and 3 <sup>rd</sup> dose<br>Home treated cases 62.2%<br>Cases treated in primary care 79.9%<br>Hospitalizations 84.0%<br>A&E visits 82.4%                                                                                                                                                                                                                                                                                                                                                                                                                                                                                                                                                                                                                                                                                         |
|               | [30] | Giammanco    | Italy       | 2009 | Rotarix & RotaTeq   | Hospitalizations and emergency visits 90%<br>At home visits 85%<br>Protection efficacy 2 years after the vaccination 85%                                                                                                                                                                                                                                                                                                                                                                                                                                                                                                                                                                                                                                                                                                                                                                                                                                                                                                                                                                   |
|               | [33] | Zomer        | Netherlands | 2008 | Rotarix & RotaTeq   | Rotarix:<br>severe: 84.7% (83% in second season, 90% in first season)<br>RotaTeq:<br>hospit and ED: 94.5%<br>severe: 88% in second season                                                                                                                                                                                                                                                                                                                                                                                                                                                                                                                                                                                                                                                                                                                                                                                                                                                                                                                                                  |
|               | [34] | Mangen       | Netherlands | 2010 | Rotarix vs. RotaTeq | First dose (RotaTeq)<br>Community-acquired, non-hospitalized RV-GE cases Pert(33%; 38%; 43%)<br>Hospitalized and fatal RV-GE cases Pert(54%; 59%; 64%)<br>First dose (Rotarix)<br>RV-GE cases requiring no medical services Pert (80%; 87%; 92%)<br>RV-GE cases requiring medical services Pert (84%; 90%; 95%)<br>Second dose (RotaTeq)<br>Community-acquired, non-hospitalized RV-GE cases Pert(34%; 39%; 44%)<br>Hospitalized and fatal RV-GE cases Pert(76%; 81%; 86%)<br>First season (after third/second dose)<br>RV-GE cases requiring no medical service Pert(67%, 74%, 80%) / Pert (80%; 87%; 92%)<br>RV-GE cases visiting a GP, but not being hospitalized Pert(74%, 86%, 93%) / Pert(84%, 92%, 96%)<br>Hospitalized and fatal RV-GE cases Pert(91%, 96%, 98%) / Pert(82%, 100%, 100%)<br>Second season<br>RV-GE cases requiring no medical service Pert(55%, 63%, 69%) / Pert(64%, 72%, 77%)<br>RV-GE cases visiting a GP, but not being hospitalized Pert(63%, 75%, 81%) / Pert(68%, 76%, 81%)<br>Hospitalized and fatal RV-GE cases Pert(83%, 88%, 90%) / Pert(74%, 92%, 92%) |
|               | [37] | Rubio-Terres | Spain       | 2011 | Rotarix & RotaTeq   | Non-severe (RotaTeq) 66.9%<br>Severe (RotaTeq): 94.0%<br>Any (Rotarix) 85.2%                                                                                                                                                                                                                                                                                                                                                                                                                                                                                                                                                                                                                                                                                                                                                                                                                                                                                                                                                                                                               |
|               | [40] | Jit          | UK          | 2007 | Rotarix vs. RotaTeq | Severe (RotaTeq) 66.9%<br>Non-severe (RotaTeq) 94.0%<br>Any (Rotarix) 85.2%                                                                                                                                                                                                                                                                                                                                                                                                                                                                                                                                                                                                                                                                                                                                                                                                                                                                                                                                                                                                                |
|               | [41] | Lorgelly     | UK          | 2008 | Rotarix & RotaTeq   | any illness 73%<br>severe illness 92%                                                                                                                                                                                                                                                                                                                                                                                                                                                                                                                                                                                                                                                                                                                                                                                                                                                                                                                                                                                                                                                      |
| Latin America | [49] | De la Hoz    | Colombia    | 2010 | Rotarix vs. RotaTeq | First dose efficacy (Rotarix & RotaTeq): 40%<br>Second dose efficacy (Rotarix): 85%                                                                                                                                                                                                                                                                                                                                                                                                                                                                                                                                                                                                                                                                                                                                                                                                                                                                                                                                                                                                        |

| CONTINENT    | REF  | AUTHOR  | COUNTRY   | YEAR | VACCINE              | VACCINE EFFICACY: ASSUMPTIONS                                                                                                                                                                                                                                                                                                                                                                                                                                                                                                                       |
|--------------|------|---------|-----------|------|----------------------|-----------------------------------------------------------------------------------------------------------------------------------------------------------------------------------------------------------------------------------------------------------------------------------------------------------------------------------------------------------------------------------------------------------------------------------------------------------------------------------------------------------------------------------------------------|
|              |      |         |           |      |                      | Second and third dose efficacy (RotaTeq): 60%<br>Third dose efficacy (RotaTeq): 95%<br>Vaccine efficacy for severe diarrhea (Rotarix): 85%<br>Vaccine efficacy for severe diarrhea (RotaTeq): 95%<br>Efficacy against death due to rotavirus diarrhea assumed to be similar to efficacy against severe disease and efficacy of partial schedules                                                                                                                                                                                                    |
| Asia/Pacific | [56] | Newall  | Australia | 2007 | Rotarix vs. RotaTeq  | RotaTeq<br>Hospitalization 95.8%<br>EDV 93.7%<br>GPV 86%<br>Rotarix<br>hospitalization 85%<br>EDV 83.1%<br>GPV 76.3%                                                                                                                                                                                                                                                                                                                                                                                                                                |
|              | [57] | Wang    | China     | 2009 | not vaccine specific | any severe type of gastroenteritis caused by rotavirus 75%<br>adverse event rate following immunization of 3%<br>duration of protection: 5 yrs                                                                                                                                                                                                                                                                                                                                                                                                      |
|              | [61] | Chodick | Israel    | 2009 | Rotarix vs. RotaTeq  | RotaTeq mild cases: 73%<br>RotaTeq severe cases: 92%<br>Rotarix: 85%                                                                                                                                                                                                                                                                                                                                                                                                                                                                                |
|              | [66] | Wu      | Taiwan    | 2009 | Rotarix vs. RotaTeq  | RotaTeq:<br>Hospitalization 95.8%<br>Emergency department visits 93.7%<br>Physician office visits 86%<br>All-cause AGE-related hospitalization 58.9%<br>Rotarix:<br>Hospitalization 85%<br>Emergency department visits 83.1%<br>Physician office visits 76.3%<br>All-cause AGE-related hospitalization 42%                                                                                                                                                                                                                                          |
| USA          | [73] | Shim    | USA       | 2009 | Rotarix vs. RotaTeq  | mild: 65%<br>severe (including hosp): 90%                                                                                                                                                                                                                                                                                                                                                                                                                                                                                                           |
|              | [74] | Weycker | USA       | 2009 | Rotarix vs. RotaTeq  | Rotarix / RotaTeq<br>One dose:<br>Death/hospitalization/emergency department visit 90% / 48%<br>Physician office/hospital outpatient visit 84% / 42%<br>Mild (no medical attention) 71% / 36%<br>Two doses:<br>Death/hospitalization/emergency department visit 96% / 90%<br>Physician office/hospital outpatient visit 84% / 84%<br>Mild (no medical attention) 71% / 71%<br>Three doses:<br>Death/hospitalization/emergency department visit – / 96%<br>Physician office/hospital outpatient visit – / 84%<br>Mild (no medical attention) – / 71% |

Table 5. RVGE incidence data used in economic studies reviewed

| CONTINENT | REF  | AUTHOR  | COUNTRY | REPORTED                                                            | AVERAGE PER PERSON PER YEAR |
|-----------|------|---------|---------|---------------------------------------------------------------------|-----------------------------|
| Europe    | [19] | Melliez | France  | Incidence of RVGE (seeking med care) per month per child:<br>0.0068 | 0.0816                      |

| CONTINENT     | REF  | AUTHOR              | COUNTRY     | REPORTED                                                                                                                                                                                                                                                  | AVERAGE PER PERSON PER YEAR                                                  |
|---------------|------|---------------------|-------------|-----------------------------------------------------------------------------------------------------------------------------------------------------------------------------------------------------------------------------------------------------------|------------------------------------------------------------------------------|
|               | [20] | Standaert           | France      | 300,000 RVGE cases among children <5 years, for a birth cohort of 750,000 children                                                                                                                                                                        | 0.08                                                                         |
|               | [27] | Redmon              | Ireland     | Per 1000 children annually: 80 RV infections                                                                                                                                                                                                              | 0.08                                                                         |
|               | [31] | Welte               | Netherlands | Risk of RV-attributable Gastroenteritis over 5 years: 0.337 <sup>1</sup>                                                                                                                                                                                  | 0.0674                                                                       |
|               | [33] | Zomer               | Netherlands | 58,000 cases in children <5 years annually, for a birth cohort of 190,000                                                                                                                                                                                 | 0.061                                                                        |
|               | [34] | Mangen              | Netherlands | Annual community-acquired RV in a non-vaccinated population for children < 5: 65,000<br>Assuming 889,364 children < 5                                                                                                                                     | 0.07                                                                         |
|               | [35] | Rozenbaum           | Netherlands | Total number of community-acquired RV cases: 65,680 per million children<br>Assuming 889,364 children < 5                                                                                                                                                 | 0.066                                                                        |
|               | [41] | Lorgelly            | UK          | By year 5: cumulative incidence of rotavirus 70%                                                                                                                                                                                                          | 0.14                                                                         |
|               | [42] | Martin              | UK          | Community-acquired RV infections 10.35%                                                                                                                                                                                                                   | 0.1035                                                                       |
| Latin America | [45] | Soárez              | Brazil      | Cumulative incidence of diarrhoea over 5 yrs: 1 (assume not repeated episodes)<br>including mild diarrhoea 0.7437, Moderate diarrhoea 0.2247, Severe diarrhoea 0.0316                                                                                     | Mild: 0.1487<br>Moderate: 0.0449<br>Severe: 0.00632                          |
|               | [49] | De la Hoz           | Colombia    | Diarrhea incidence (all causes) <2 years: 147 *100 child/year<br>% of all diarrheas due to RV: 10                                                                                                                                                         | 0.147                                                                        |
|               | [53] | Clarck              | Peru        | Incidence of RVG: 0.13 episodes per child<5 yrs per year                                                                                                                                                                                                  | 0.13                                                                         |
| Asia/Pacific  | [57] | Wang                | China       | annual incidence: 61.4 RVGE cases per 1000 per yr during epidemic season,                                                                                                                                                                                 | 0.0614                                                                       |
|               | [59] | Rose                | India       | Cumulative incidence by 24 months: First infection 0.96 Second infection 0.69 Third infection 0.42                                                                                                                                                        | First infection : 0.80<br>Second infection: 0.053<br>Third infection: 0.0127 |
|               | [63] | Kang                | Korea       | Proportion (cumulative) of children experiencing primary infection of rotavirus diarrhea (%)<br>To 6 months after birth : 5.3<br>Through year 1 :26.8<br>Through year 2 : 71.5<br>Through year 3 : 90.4<br>Through year 4 : 95.0<br>Through year 5 : 99.0 | 0.198                                                                        |
|               | [67] | Chotivitayatarakorn | Thailand    | Incidence of acute gastro: 0.93-1.35 cases / person-year<br>proportion due to rota: 12.2%                                                                                                                                                                 | 0.244                                                                        |
| USA           | [73] | Shim                | USA         | Any rotavirus gastroenteritis 0.8000 (annual?)                                                                                                                                                                                                            | 0.16                                                                         |
|               | [74] | Weycker             | USA         | Any rotavirus gastroenteritis 15%                                                                                                                                                                                                                         | 0.15                                                                         |
|               | [74] | Weycker             | USA         | Cumulative risk of RVGE over 5 yrs: 0.75                                                                                                                                                                                                                  | 0.15                                                                         |
| Africa        | [75] | Ortega              | Egypt       | 5-Year incidence without vaccination program: 0.95                                                                                                                                                                                                        | 0.19                                                                         |
|               | [77] | Berry               | Malawi      | Rotavirus infection cumulative incidence by age 2 years : 0.90                                                                                                                                                                                            | 0.18                                                                         |

**Table 6. Average yearly incidence of RVGE-related hospitalization in economic studies reviewed**

<sup>1</sup> The use of the term “risk” raises the question whether the reported estimates represents the probability of occurrence of at least one episode over 5 years or the number of episodes per child over 5 years. We have assumed the latter

| CONTINENT     | REF  | AUTHOR             | COUNTRY     | AVERAGE YEARLY INCIDENCE OF RVGE-RELATED HOSPITALIZATION                      |
|---------------|------|--------------------|-------------|-------------------------------------------------------------------------------|
| Europe        | [13] | Fruytier           | Belgium     | 0.440%                                                                        |
|               | [14] | Dhont              | Belgium     | 0.990%                                                                        |
|               | [15] | Bilcke             | Belgium     | 0.676%                                                                        |
|               | [18] | Huet               | France      | 0.870%                                                                        |
|               | [19] | Melliez            | France      | 1st year of life: 0.93%<br>2nd year of life: 0.54%<br>3rd year of life: 0.33% |
|               | [20] | Standaert          | France      | 0.480%                                                                        |
|               | [21] | Bénard             | France      | 0.470%                                                                        |
|               | [23] | Buesch             | Germany     | 0.635%                                                                        |
|               | [25] | Brüggenjürgen      | Germany     | 0.635%                                                                        |
|               | [26] | Syriopoulou        | Greece      | 0.365%                                                                        |
|               | [28] | Redmon             | Ireland     | 0.100%                                                                        |
|               | [28] | Tilson             | Ireland     | 0.0314%                                                                       |
|               | [29] | Panatto            | Italy       | 0.550%                                                                        |
|               | [30] | Giammanco          | Italy       | 0.520%                                                                        |
|               | [31] | Welte              | Netherlands | 0.300%                                                                        |
|               | [33] | Zomer              | Netherlands | 0.340%                                                                        |
|               | [34] | Mangen             | Netherlands | 0.26-0.45 (children < 5 yrs)<br>+5% for children > 5 yrs                      |
|               | [35] | Rozenbaum          | Netherlands | 0.36%                                                                         |
|               | [36] | Portugal           | Portugal    | 0.460%                                                                        |
|               | [38] | Rubio-Perez        | Spain       | 0.480%                                                                        |
|               | [40] | Jit                | UK          | 0.450%                                                                        |
|               | [41] | Lorgelly           | UK          | 0.400%                                                                        |
|               | [42] | Martin             | UK          | 0.449%                                                                        |
| [43]          | Jit  | UK                 | 0.450%      |                                                                               |
|               |      | Netherlands        | 0.730%      |                                                                               |
|               |      | Belgium            | 0.775%      |                                                                               |
|               |      | France             | 0.480%      |                                                                               |
|               |      | Finland            | 0.795%      |                                                                               |
| Latin America | [46] | Constenla          | Brazil      | 0.700%                                                                        |
|               | [48] | Constenla          | Chile       | 0.560%                                                                        |
|               | [49] | De la Hoz          | Colombia    | 2.01%                                                                         |
|               | [50] | Valencia-Mendoza   | Mexico      | 0.7%                                                                          |
|               | [51] | Constenla          | Mexico      | 0.140%                                                                        |
|               | [52] | Constenla          | Panama      | 0.480%                                                                        |
|               | [54] | Constenla          | Venezuela   | 0.460%                                                                        |
|               | [55] | Rheingans          | Venezuela   | 0.460%                                                                        |
|               |      |                    | Mexico      | 0.140%                                                                        |
|               |      |                    | Brazil      | 0.690%                                                                        |
|               |      | Chile              | 0.560%      |                                                                               |
|               |      | Dominican Republic | 0.480%      |                                                                               |
|               |      | Argentina          | 0.630%      |                                                                               |
|               |      | Honduras           | 0.280%      |                                                                               |
| Asia/Pacific  | [56] | Newall             | Australia   | 0.780%                                                                        |
|               | [57] | Wang               | China       | 0.309%                                                                        |

| CONTINENT     | REF  | AUTHOR              | COUNTRY                                                                                                               | AVERAGE YEARLY INCIDENCE OF RVGE-RELATED HOSPITALIZATION                  |
|---------------|------|---------------------|-----------------------------------------------------------------------------------------------------------------------|---------------------------------------------------------------------------|
|               | [60] | Esposito            | India                                                                                                                 | 0.652%                                                                    |
|               | [61] | Chodick             | Israel                                                                                                                | 3.000%                                                                    |
|               | [63] | Kang                | Korea                                                                                                                 | 3.3%                                                                      |
|               | [65] | Milne               | New-Zealand                                                                                                           | 0.476%                                                                    |
|               | [66] | Wu                  | Taiwan                                                                                                                | 1.32%                                                                     |
|               | [67] | Chotivitayatarakorn | Thailand                                                                                                              | 1.125%                                                                    |
|               | [68] | Isakbaeva           | Uzbekistan                                                                                                            | 0.980%                                                                    |
|               | [70] | Kim                 | Vietnam                                                                                                               | 0.420%                                                                    |
| USA           | [72] | Widdowson           | USA                                                                                                                   | 0.330%                                                                    |
| Africa        | [75] | Ortega              | Egypt                                                                                                                 | 0.57%                                                                     |
|               | [76] | Tate                | Kenya                                                                                                                 | 0.107                                                                     |
|               | [78] | Tate                | Uganda                                                                                                                | 0.0102%                                                                   |
| All countries | [79] | Rheingans           | Developing countries                                                                                                  | Low income 0.32%<br>Lower-middle income 0.4%<br>Upper-middle income 0.58% |
|               | [80] | Atherly             | Region of the Americas<br>European Region<br>African region<br>Eastern Mediterranean region<br>Southeast Asian region | 0.32%                                                                     |

Table 7. Average yearly incidence of physician visits in economic studies reviewed

| CONTINENT | REF      | AUTHOR        | COUNTRY                 | AVERAGE YEARLY INCIDENCE                                |
|-----------|----------|---------------|-------------------------|---------------------------------------------------------|
| Europe    | [13]     | Fruytier      | Belgium                 | Seeking medical care 3.87%                              |
|           | [14]     | Dhont         | Belgium                 | GP/P visits: 1.59%                                      |
|           | [18]     | Huet          | France                  | GP/P visits 1.45%                                       |
|           | [21]     | Bénard        | France                  | Physicians office visits 3.73%                          |
|           | [23]     | Buesch        | Germany                 | GP/Paediatrician visits 4.14%                           |
|           | [25]     | Brüggenjürgen | Germany                 | GP office visits 4.14%                                  |
|           | [26]     | Syriopoulou   | Greece                  | 2.918%                                                  |
|           | [27]     | Redmon        | Ireland                 | GP visits 3.8 %                                         |
|           | [28]     | Tilson        | Ireland                 | 0.036%                                                  |
|           | [30]     | Giammanco     | Italy                   | Family Paediatrician visits 2.28%                       |
|           | [31]     | Welte         | Netherlands             | GP visits 0.56%<br>Paediatrician visits 0.46%           |
|           | [32]     | Goossens      | Netherlands             | GP consultation<br>0-1y 5.56%<br>2y 2.27%<br>3-4y 1.95% |
|           | [35]     | Rozenbaum     | Netherlands             | 1.273%                                                  |
|           | [38]     | Rubio-Perez   | Spain                   | 3.85%                                                   |
| [40]      | Jit      | UK            | GP consultations 2.84%  |                                                         |
| [41]      | Lorgelly | UK            | Seeking GP advice 1.92% |                                                         |



| CONTINENT     | REF       | AUTHOR              | COUNTRY               | AVERAGE YEARLY INCIDENCE                          |
|---------------|-----------|---------------------|-----------------------|---------------------------------------------------|
|               | [43]      | Jit                 | UK                    | Primary care 2.84%                                |
|               | [43]      | Jit                 | Finland               | Primary care 2.341%                               |
|               |           |                     | France                | Primary care 4.311%                               |
|               |           |                     | Belgium               | Primary care 3.964%                               |
|               |           |                     | Netherlands           | Primary care 0.955%                               |
| Latin America | [46]      | Constenla           | Brazil                | Ambulatory visit 3.99%                            |
|               | [48]      | Constenla           | Chile                 | Outpatient visit 4.04%                            |
|               | [49]      | De la Hoz           | Colombia              | Health Service Consulting 5.81%                   |
|               | [51]      | Constenla           | Mexico                | Outpatient visit 5.3%                             |
|               | [52]      | Constenla           | Panama                | Ambulatory visit 5.66%                            |
|               | [54]      | Constenla           | Venezuela             | Ambulatory 3.8%                                   |
|               | [55]      | Rheingans           | Venezuela             | Outpatient visit 5.3%                             |
|               |           |                     | Argentina             | Outpatient visit 7.2%                             |
|               |           |                     | Honduras              | Outpatient visit 5.3%                             |
|               |           |                     | Brazil                | Outpatient visit 4.1%                             |
|               |           |                     | Dominican Republic    | Outpatient visit 5.4%                             |
| Chile         |           |                     | Outpatient visit 4.7% |                                                   |
| [55]          | Rheingans | Mexico              | Outpatient visit 5.3% |                                                   |
| Asia/Pacific  | [57]      | Wang                | China                 | Outpatient 3.04%                                  |
|               | [60]      | Esposito            | India                 | Not clear                                         |
|               | [61]      | Chodick             | Israel                | GP visit 6.9%                                     |
|               | [63]      | Kang                | Korea                 | 17.8%                                             |
|               | [66]      | Wu                  | Taiwan                | Physician office visits 10.3%<br>Outpatient: 2.9% |
|               | [67]      | Chotivitayatarakorn | Thailand              | 2.78%                                             |
|               | [70]      | Kim                 | Vietnam               | Outpatient 1.97%                                  |
| USA           | [72]      | Widdowson           | USA                   | Office visit 1.93%                                |
| Africa        | [75]      | Ortega              | Egypt                 | Outpatient visit 5.1%                             |
|               | [76]      | Tate                | Kenya                 | 17.8%                                             |
|               | [78]      | Tate                | Uganda                | 0.18%                                             |

\*Studies in which physician visits rates are clearly reported.

Table 8. Average yearly incidence of emergency department visits in economic studies reviewed

| CONTINENT | REF  | AUTHOR      | COUNTRY | AVERAGE YEARLY INCIDENCE |
|-----------|------|-------------|---------|--------------------------|
| Europe    | [13] | Fruytier    | Belgium | 0.94%                    |
|           | [14] | Dhont       | Belgium | 0%                       |
|           | [18] | Huet        | France  | 2.65%                    |
|           | [21] | Bénard      | France  | 2.4%                     |
|           | [26] | Syriopoulou | Greece  | 1.90%                    |
|           | [28] | Tilson      | Ireland | 5.2%                     |
|           | [30] | Giammanco   | Italy   | 1.90%                    |
|           | [38] | Rubio-Perez | Spain   | 1.44%                    |
|           | [40] | Jit         | UK      | 0.93%                    |
|           | [41] | Lorgelly    | UK      | 0.38%                    |
|           | [42] | Martin      | UK      | 0.73%                    |
|           | [43] | Jit         | Belgium | 0%                       |
|           |      |             | UK      | 0.93%                    |
|           |      |             | Finland | 0.52%                    |

| CONTINENT    | REF  | AUTHOR    | COUNTRY   | AVERAGE YEARLY INCIDENCE |
|--------------|------|-----------|-----------|--------------------------|
|              |      |           | France    | 0.76%                    |
| Asia/Pacific | [56] | Newall    | Australia | 1.72%                    |
|              | [66] | Wu        | Taiwan    | 1.24%                    |
| USA          | [72] | Widdowson | USA       | 1.07%                    |
|              | [73] | Shim      | USA       | 1.11%                    |

\*Studies in which incidence of EDV rates are clearly reported.

Table 9. Annual death rate in economic studies reviewed

| CONTINENT     | REF  | AUTHOR        | COUNTRY     | ANNUAL DEATH RATE                                                                                                            |        |            |
|---------------|------|---------------|-------------|------------------------------------------------------------------------------------------------------------------------------|--------|------------|
| Europe        | [13] | Fruytier      | Belgium     | <0.000 01                                                                                                                    |        |            |
|               | [14] | Dhont         | Belgium     | 0.0003000%                                                                                                                   |        |            |
|               | [18] | Huet          | France      | 0.0004000%                                                                                                                   |        |            |
|               | [19] | Melliez       | France      | probability of death in the absence of medical care: 0.000144%<br>probability of death in case of hospitalization: 0.000534% |        |            |
|               | [21] | Bénard        | France      | 0.00035%                                                                                                                     |        |            |
|               | [22] | Hammerschmidt | Germany     |                                                                                                                              |        |            |
|               | [25] | Brüggenjürgen | Germany     |                                                                                                                              |        |            |
|               | [26] | Syriopoulou   | Greece      | Not clear                                                                                                                    |        |            |
|               | [28] | Tilson        | Ireland     | 0.0000027%                                                                                                                   |        |            |
|               | [33] | Zomer         | Netherlands | 0.0015000%                                                                                                                   |        |            |
|               | [34] | Mangen        | Netherlands | Mortality rate in hospitalized RV-GE cases 0.0056%-0.007%                                                                    |        |            |
|               | [35] | Rozenbaum     | Netherlands | 0.0072%                                                                                                                      |        |            |
|               | [36] | André         | Portugal    | <0.000 01%                                                                                                                   |        |            |
|               | [38] | Rubio-Perez   | Spain       | 0                                                                                                                            |        |            |
|               | [40] | Jit           | UK          | 0.0000055%                                                                                                                   |        |            |
|               | [41] | Lorgelly      | UK          | 0.0002000%                                                                                                                   |        |            |
|               | [42] | Martin        | UK          | 0.0001700%                                                                                                                   |        |            |
| Latin America | [43] | Jit           | UK          | 0.0001090%                                                                                                                   |        |            |
|               |      |               | Netherlands | 0.0003260%                                                                                                                   |        |            |
|               |      |               | Finland     | 0.0002460%                                                                                                                   |        |            |
|               |      |               | France      | 0.0003470%                                                                                                                   |        |            |
|               |      |               | Belgium     | 0.0001020%                                                                                                                   |        |            |
|               |      |               | [46]        | Constenla                                                                                                                    | Brazil | 0.0140000% |
|               |      |               | [48]        | Constenla                                                                                                                    | Chile  | 0.0010000% |
|               | [49] | De la Hoz     | Colombia    | 0.034%                                                                                                                       |        |            |
|               | [51] | Constenla     | Mexico      | 0.0084000%                                                                                                                   |        |            |
|               | [52] | Constenla     | Panama      | 0.0106000%                                                                                                                   |        |            |
|               | [53] | Clarck        | Peru        | 0.05%                                                                                                                        |        |            |
|               | [54] | Constenla     | Venezuela   | 0.0126000%                                                                                                                   |        |            |
|               | [55] | Rheingans     | Venezuela   | 0.0130000%                                                                                                                   |        |            |
| Mexico        |      |               | 0.0080000%  |                                                                                                                              |        |            |
| Argentina     |      |               | 0.0027000%  |                                                                                                                              |        |            |
| Brazil        |      |               | 0.0143000%  |                                                                                                                              |        |            |
| Honduras      |      |               | 0.0640000%  |                                                                                                                              |        |            |
|               |      | Dominican     | 0.0440000%  |                                                                                                                              |        |            |

| CONTINENT    | REF  | AUTHOR              | COUNTRY    | ANNUAL DEATH RATE                                                    |
|--------------|------|---------------------|------------|----------------------------------------------------------------------|
|              |      |                     | Republic   |                                                                      |
|              |      |                     | Panama     | 0.0110000%                                                           |
|              |      |                     | Chile      | 0.0009000%                                                           |
| Asia/Pacific | [57] | Wang                | China      | 0%                                                                   |
|              | [60] | Esposito            | India      | Not clear                                                            |
|              | [61] | Chodick             | Israel     | 0.0018000%                                                           |
|              | [64] | Flem                | Kyrgyzstan | 0.0015%                                                              |
|              | [66] | Wu                  | Taiwan     | mortality rate by age 5 years 0.000034                               |
|              | [67] | Chotivitayatarakorn | Thailand   | 0.002%                                                               |
|              | [68] | Isakbaeva           | Uzbekistan | 0.0070000%                                                           |
|              | [70] | Kim                 | Vietnam    | 0.0200000%                                                           |
|              | [71] | Podewils            | Asia       | (low GNI / middle GNI / high GNI)<br>death: 0.074% / 0.034% / 0.002% |
| USA          | [72] | Widdowson           | USA        | 0.0001500%                                                           |
| Africa       | [76] | Tate                | Kenya      | Death: 0.0016%                                                       |
|              | [77] | Berry               | Malawi     | 0.01114%                                                             |
|              | [78] | Tate                | Uganda     | 0.096%                                                               |

\*Studies in which mortality rates are clearly reported.

Table 10. Inputs and sources used by studies using QALYs and DALYs

| TYPE  | CONTINENT     | REF  | AUTHOR              | COUNTRY     | VALUES IN BASE-CASE                                                                                                                                                                    | SOURCES & COMMENTS                                                                                                                                                                                                 |
|-------|---------------|------|---------------------|-------------|----------------------------------------------------------------------------------------------------------------------------------------------------------------------------------------|--------------------------------------------------------------------------------------------------------------------------------------------------------------------------------------------------------------------|
| DALYs | Europe        | [33] | Zomer               | Netherlands | 0.0083 per hospitalized case<br>0.0076 per case consulting a GP<br>0.0009 per non-consulting case                                                                                      | Kemmeren 2006                                                                                                                                                                                                      |
|       |               | [34] | Mangen              | Netherlands | 0.00089 if no medical services<br>0.0076 per RV-GE cases visiting a GP, but not being hospitalized<br>0.0083 per community-acquired hospitalized 0.0052–0.0083 per nosocomial-acquired | Zomer 2008                                                                                                                                                                                                         |
|       | Latin America | [46] | Constenla           | Brazil      | Not reported                                                                                                                                                                           | Murray 1996                                                                                                                                                                                                        |
|       |               | [48] | Constenla           | Chile       | Not reported                                                                                                                                                                           | Not clear                                                                                                                                                                                                          |
|       |               | [49] | De la Hoz           | Colombia    | Not reported                                                                                                                                                                           | Not reported                                                                                                                                                                                                       |
|       |               | [49] | De la Hoz           | Colombia    | Not reported                                                                                                                                                                           | Not reported                                                                                                                                                                                                       |
|       |               | [52] | Constenla           | Panama      | Not reported                                                                                                                                                                           | Not clear                                                                                                                                                                                                          |
|       |               | [53] | Clarck              | Peru        | 0.119 per non-severe GE<br>0.518 per severe cases                                                                                                                                      | WHO panel                                                                                                                                                                                                          |
|       |               | [54] | Constenla           | Venezuela   | Not reported                                                                                                                                                                           | Not reported                                                                                                                                                                                                       |
|       | Asia/Pacific  | [58] | Ho                  | Hong Kong   | 0.19 per hospital admissions<br>0.119 per outpatient clinic visit                                                                                                                      | CEA registry, and World Bank                                                                                                                                                                                       |
|       |               | [59] | Rose                | India       | 0.0023 per symptomatic episode                                                                                                                                                         | Global Burden of Disease Study                                                                                                                                                                                     |
|       |               | [60] | Esposito            | India       | Not reported                                                                                                                                                                           | Murray 1996.                                                                                                                                                                                                       |
|       |               | [67] | Chotivitayatarakorn | Thailand    | Not reported                                                                                                                                                                           | Shepard 1995                                                                                                                                                                                                       |
|       |               | [68] | Isakbaeva           | Uzbekistan  | Not reported                                                                                                                                                                           | Murray 1996                                                                                                                                                                                                        |
|       |               | [70] | Kim                 | Vietnam     | 0.119 per diarrheal episode                                                                                                                                                            | Standard Global Burden of Disease (GBD) approach                                                                                                                                                                   |
|       |               | [75] | Ortega              | Egypt       | Not reported                                                                                                                                                                           | Murray 1996                                                                                                                                                                                                        |
|       | Africa        | [76] | Tate                | Kenya       | Not reported                                                                                                                                                                           | Baltussen 2002                                                                                                                                                                                                     |
|       |               | [77] | Berry               | Malawi      | Not reported                                                                                                                                                                           | WHO Life Tables for WHO Member States.<br><a href="http://www.who.int/whosis/database/life_tables/life_tables.cfm">http://www.who.int/whosis/database/life_tables/life_tables.cfm</a> .<br>Accessed 21 April 2009. |
|       |               | [78] | Tate                | Uganda      | Not reported                                                                                                                                                                           | Baltussen 2002                                                                                                                                                                                                     |
|       |               | [78] | Tate                | Uganda      | Not reported                                                                                                                                                                           | Baltussen 2002                                                                                                                                                                                                     |
| QALYs | Europe        | [13] | Fruytier            | Belgium     | age <18 / >18                                                                                                                                                                          | M-TAG. Utility scores for diarrhea in infants. (Data on file GlaxoSmithKline)                                                                                                                                      |

| TYPE | CONTINENT | REF  | AUTHOR        | COUNTRY     | VALUES IN BASE-CASE                                                                                                                                                                                                                                                                                                                                                                                                                                                                                                                                                                                                | SOURCES & COMMENTS                                                                                                                                             |
|------|-----------|------|---------------|-------------|--------------------------------------------------------------------------------------------------------------------------------------------------------------------------------------------------------------------------------------------------------------------------------------------------------------------------------------------------------------------------------------------------------------------------------------------------------------------------------------------------------------------------------------------------------------------------------------------------------------------|----------------------------------------------------------------------------------------------------------------------------------------------------------------|
|      |           |      |               |             | diarrhoea: 0.891 / 0.844<br>consultation: 0.781 / 0.688<br>emergency room visit: 0.425 / 0.425<br>hospitalization: 0.425 / 0.200                                                                                                                                                                                                                                                                                                                                                                                                                                                                                   | 2005.                                                                                                                                                          |
|      |           | [15] | Bilcke        | Belgium     | If med care:<br>QALY loss by child: 0.0022<br>QALY loss by 1 caregiver: 0.001839<br>If no med care: same divided by 2                                                                                                                                                                                                                                                                                                                                                                                                                                                                                              | Sénécal 2006                                                                                                                                                   |
|      |           | [16] | Nohynek       | Finland     | Not reported                                                                                                                                                                                                                                                                                                                                                                                                                                                                                                                                                                                                       | Not reported                                                                                                                                                   |
|      |           | [19] | Melliez       | France      | Utility<br>0.884 for mild case<br>0.816 for severe case                                                                                                                                                                                                                                                                                                                                                                                                                                                                                                                                                            | Sénécal 2006                                                                                                                                                   |
|      |           | [20] | Standaert     | France      | (Utility <18 months ; >18 months)<br>diarrhoea 0.891 ; 0.844<br>severe diarrhoea 0.891 ; 0.844<br>medical visit 0.781 ; 0.688<br>emergency visit 0.425<br>hospitalization 0.425 ; 0.200<br>nosocomial infection 0.425 ; 0.200<br>death 0                                                                                                                                                                                                                                                                                                                                                                           | Martin 2008                                                                                                                                                    |
|      |           | [22] | Hammerschmidt | Germany     | Diarrhoea 0.546<br>Severe diarrhoea 0.339<br>Hospitalised cases 0.312<br>Nosocomial cases 0.501                                                                                                                                                                                                                                                                                                                                                                                                                                                                                                                    | Huppertz 2007                                                                                                                                                  |
|      |           | [27] | Redmon        | Ireland     | QALY loss<br>0.00220 per episode for a child                                                                                                                                                                                                                                                                                                                                                                                                                                                                                                                                                                       | Brisson 2009, Martin 2008                                                                                                                                      |
|      |           | [28] | Tilson        | Ireland     | QALY loss for one child 0.0022<br>QALY loss for one caregiver 0.0018                                                                                                                                                                                                                                                                                                                                                                                                                                                                                                                                               | Brisson 2010                                                                                                                                                   |
|      |           | [29] | Panatto       | Italy       | Not reported                                                                                                                                                                                                                                                                                                                                                                                                                                                                                                                                                                                                       | Not reported                                                                                                                                                   |
|      |           | [32] | Goossens      | Netherlands | RV infection, in mild cases, when no GP is consulted<br><1.5 years old: 0.891<br>1.5-4 years old: 0.844<br>Utility RV infection, moderate cases, with GP consultation<br><1.5 years old: 0.781<br>1.5-4 years old: 0.688<br>Utility RV infection, severe cases, with hospitalization<br><1.5 years old: 0.425<br>1.5-4 years old: 0.200                                                                                                                                                                                                                                                                            | UK Health State Utility Valuation Study – Using the EQ5 questionnaire & VAS draft report; 2005,M-Tag:London. Used ratings from British GPs and paediatricians. |
|      |           | [35] | Rozenbaum     | Netherlands | (no detriment for caregivers)<br>RV infection treated at home<br>0-18 months: 0.0015<br>18-59 months: 0.0025<br>RV infection requiring medical attention (GP)<br>0-18 months: 0.0022<br>18-59 months: 0.0031<br>To be conservative, authors based QALY estimates on the Canadian study, but applied a correction factor for age and severity (hospitalised cases) on the basis of the UK study<br>For cases requiring no medical help, authors assumed that the QALY loss would be 31% lower than for cases requiring a GP visit. This was based on the relative duration of illness for cases visiting a GP being | Goossens 2008, Mangen 2010, Brisson 2010                                                                                                                       |

| TYPE | CONTINENT    | REF  | AUTHOR      | COUNTRY                                                          | VALUES IN BASE-CASE                                                                                                                                                                                                                                                                                                                  | SOURCES & COMMENTS        |
|------|--------------|------|-------------|------------------------------------------------------------------|--------------------------------------------------------------------------------------------------------------------------------------------------------------------------------------------------------------------------------------------------------------------------------------------------------------------------------------|---------------------------|
|      |              |      |             |                                                                  | 7.1 days and cases treated at home being 4.9 days.                                                                                                                                                                                                                                                                                   |                           |
|      |              | [36] | André       | Portugal                                                         | age <18 / >18<br>diarrhoea: 0.891 / 0.844<br>severe diarrhoea: 0.425 / 0.200<br>consultation: 0.781 / 0.688<br>emergency room visit: 0.425 / 0.425<br>hospitalization: 0.425 / 0.200<br>nosocomial infection: 0.425 / 0.200                                                                                                          | Not reported              |
|      |              | [38] | Rubio-Perez | Spain                                                            | QALY loss per episode of rotavirus<br>To child 0.00220<br>To each caregiver 0.00184                                                                                                                                                                                                                                                  | Brisson 2010              |
|      |              | [40] | Jit         | UK                                                               | QALY loss per episode of RV<br>0.00220 for child<br>0.00184 for each caregiver                                                                                                                                                                                                                                                       | Sénécal 2006              |
|      |              | [42] | Martin      | UK                                                               | for infants without diarrhoea: 1<br>for infants aged <18 months with diarrhoea not hospitalized: 0.781<br>for infants aged 18 months to 5 years with diarrhoea not hospitalized: 0.688<br>for infants aged <18 months with diarrhoea hospitalized: 0.425<br>for infants aged 18 months to 5 years with diarrhoea hospitalized: 0.200 | Martin 2008               |
|      |              | [43] | Jit         | Belgium<br>England and Wales<br>Finland<br>France<br>Netherlands | QALY loss per episode<br>0.0022 for children<br>0.001839 for their caregivers                                                                                                                                                                                                                                                        | Sénécal 2006              |
|      | Asia/Pacific | [56] | Newall      | Australia                                                        | QALYs loss for children<br>hospitalization/EDV/GPV: 0.00186<br>QALYs lost for 1 caregiver<br>hospitalization/ EDV/GPV: 0.00200<br>healthy child: 0.9892                                                                                                                                                                              | Sénécal 2006              |
|      |              | [61] | Chodick     | Israel                                                           | QALY loss<br>0.00220 per episode for a child<br>0.00184 for 2 caregivers                                                                                                                                                                                                                                                             | Sénécal 2006              |
|      |              | [62] | Igarashi    | Japan                                                            | QALY (not reported)                                                                                                                                                                                                                                                                                                                  | Not reported              |
|      |              | [65] | Milne       | New-Zealand                                                      | QALY loss per episode<br>0.00220 for a child<br>0.00184 for a caregiver                                                                                                                                                                                                                                                              | Jit 2007                  |
|      | USA          | [73] | Shim        | USA                                                              | young children's quality of life: 0.9892<br>QALY loss<br>0.00186 for children with RV infections that require hospitalization,<br>ER, visit or GP<br>0.002 for primary caregiver                                                                                                                                                     | Newall 2007, Sénécal 2006 |
